# Supplementary material for: Evolution of fatty acid taste in drosophilids
Source: Cell Rep. Author manuscript; Available in PMC 2023 Dec 5. (PMC10697176; doi:10.1016/j.celrep.2023.113297)
Supplement: 1 [file NIHMS1941907-supplement-1.pdf]

**Cell Reports, Volume 42**

## **Supplemental information**

### **Evolution of fatty acid taste in drosophilids**

**Manali Dey, Elizabeth Brown, Sandhya Charlu, Alex Keene, and Anupama Dahanukar**

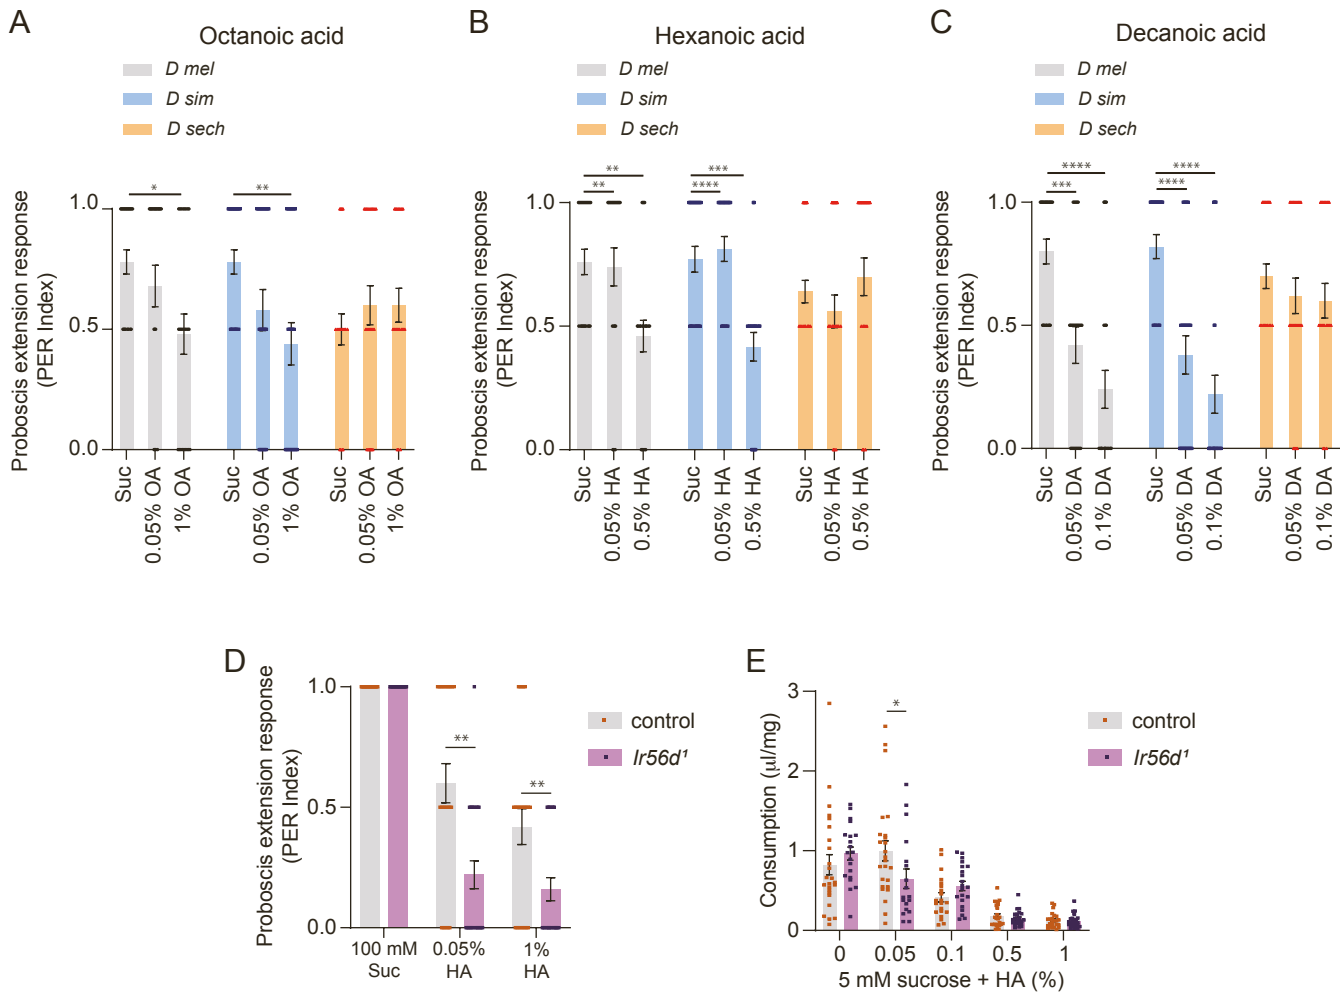

**Figure S1, Related to Figure 1. Noni FAs elicit proboscis extension in generalist and specialist species.**

**A)** Proboscis extension response of three species to sucrose (30 mM) or octanoic acid (OA) at two different concentrations.  $n=24$ . **B)** Proboscis extension response of three species to sucrose (30 mM) or hexanoic acid (HA) at two different concentrations.  $n=25$ . **C)** Proboscis extension response of three species to sucrose (30 mM) or decanoic acid (DA) at two different concentrations.  $n=25$ . **D)** Proboscis extension responses to indicated concentrations of sucrose (suc) or hexanoic acid (HA).  $n=25$ . **E)** Ingested volume ( $\mu\text{l}$ ) of indicated diet normalized to body weight (mg) in mated females.  $n=18-25$ . Genotypes in D and E were: *Ir56d* parental line (control), and *Ir56d*<sup>1</sup>. Data in A-D were analyzed using Friedman's test; data in E were analyzed using two-way ANOVA with Tukey's *post hoc* multiple comparisons test. \* $p < 0.05$ , \*\* $p < 0.01$ , \*\*\* $p < 0.001$ , \*\*\*\* $p < 0.0001$ . Error bars represent SEM.

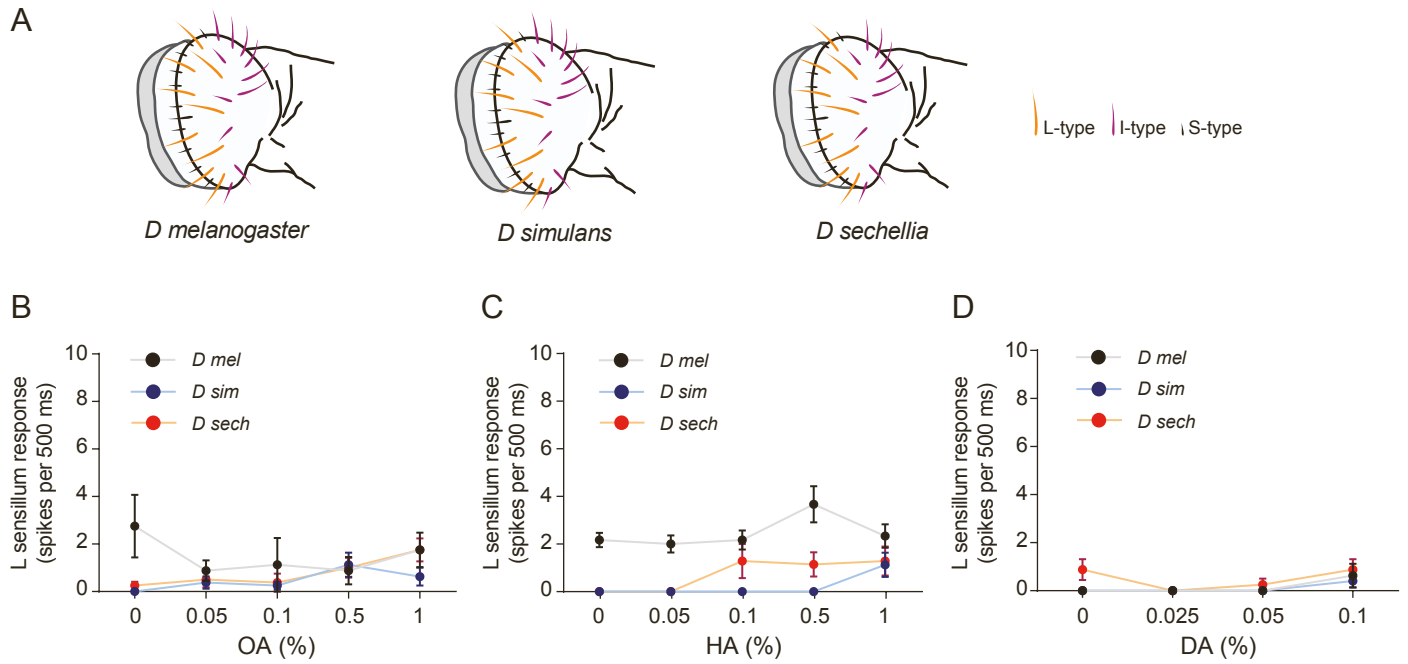

**Figure S2, Related to Figure 3. Noni FAs do not elicit robust activation of selected L-type sensilla.**

**A)** Arrangement of sensillar types in the labella of three *Drosophila* species. **B-D)** Responses of labellar L-type sensilla in indicated species to varying concentrations of octanoic acid (OA; B,  $n=8$ ), hexanoic acid (HA; C,  $n=6-8$ ), and decanoic acid (DA; D,  $n=8$ ).

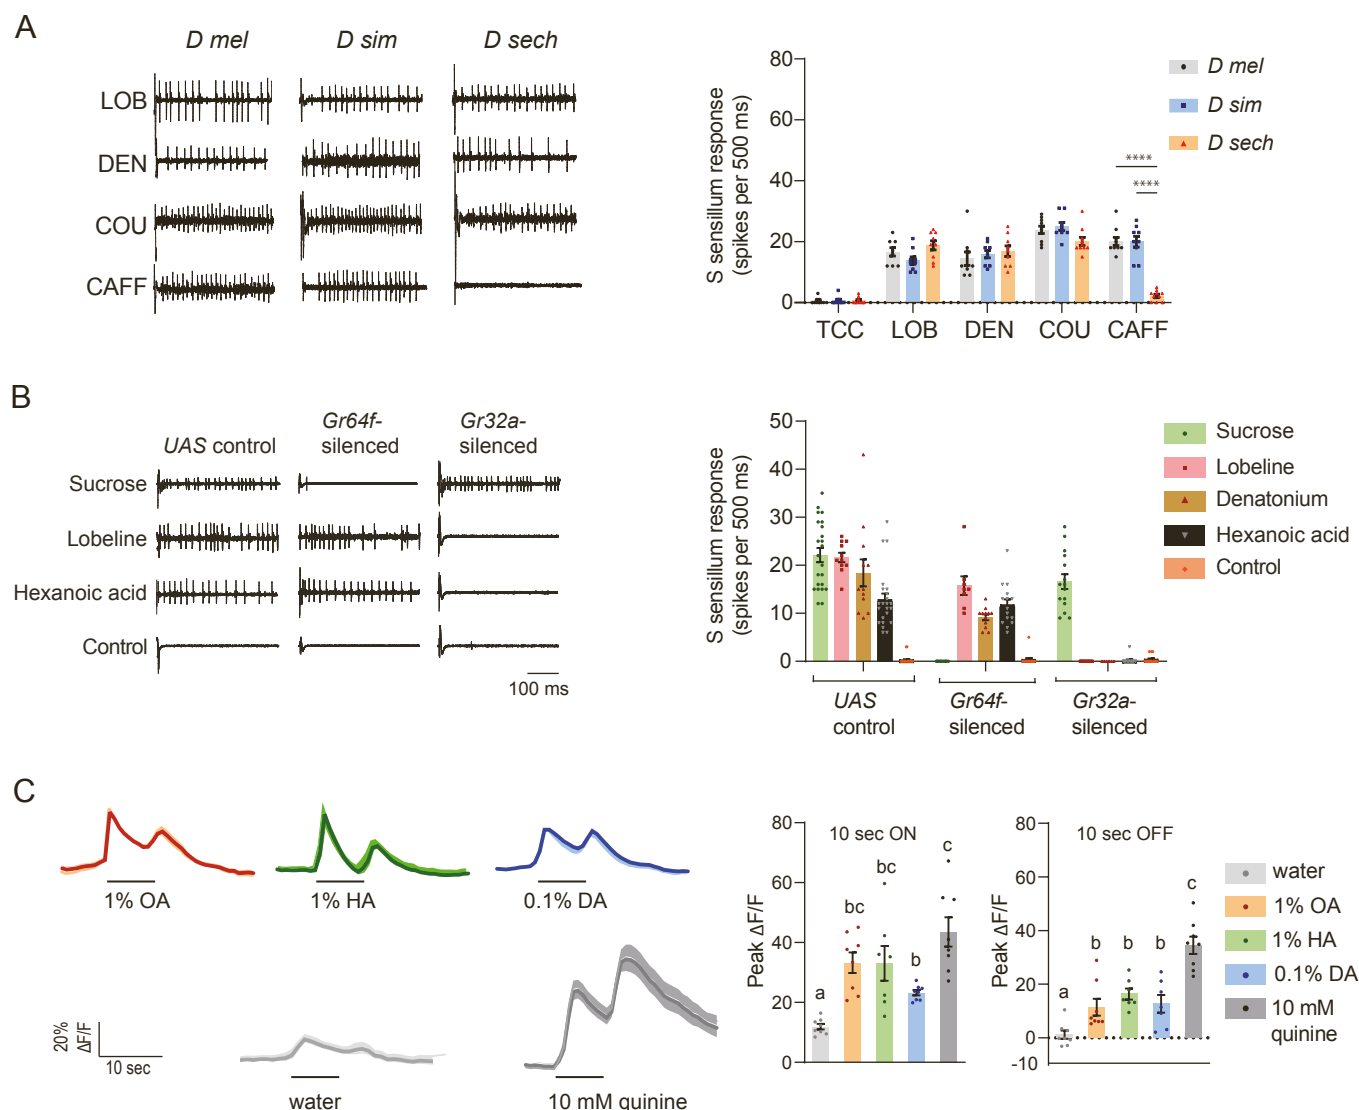

**Figure S3, Related to Figure 3. Bitter neurons in S-type sensilla are activated by noni FAs.**

**A)** Representative traces (left) and mean responses (right) of labellar S-type sensilla in indicated species upon stimulation with 10 mM of bitter tastants: lobeline (LOB), denatonium (DEN), coumarin (COU) and caffeine (CAFF).  $n=9-10$ . **B)** Representative traces (left) and mean responses (right) obtained from S-type stimulated with the indicated tastants. Genotypes were: *UAS-Kir2.1* (*UAS* control); *Gr64f-GAL4>UAS-Kir2.1* (*Gr64f*-silenced); *Gr32a-GAL4>UAS-Kir2.1* (*Gr32a*-silenced). Stimuli were: sucrose (100 mM), lobeline (10 mM), denatonium (10 mM), hexanoic acid (1%), and tricholine citrate diluent control (30 mM). For *UAS* control flies,  $n=23$  (sucrose),  $n=11$  (lobeline),  $n=12$  (denatonium),  $n=23$  (hexanoic acid),  $n=23$  (control). For *Gr64f*-silenced flies,  $n=23$  (sucrose),  $n=11$  (lobeline),  $n=12$  (denatonium),  $n=23$  (hexanoic acid),  $n=15$  (control). For *Gr32a*-silenced flies,  $n=15$  (sucrose),  $n=15$  (lobeline),  $n=6$  (denatonium),  $n=15$  (hexanoic acid),  $n=15$  (control). For each stimulus\*genotype, recordings were taken from 5-7 flies. **C)** Activity traces and average peak changes in GCaMP6 fluorescence in *Gr66a+* neurons during (10 sec ON) and immediately after (10 sec OFF) 10-sec applications of indicated tastants.  $n=7-8$ . For activity traces, the shaded region indicates  $\pm$ s.e.m. and period of stimulus application is indicated by the black bar below the trace. Data in A and B were analyzed using two-way ANOVA with Tukey's *post hoc* multiple comparisons test. Data in C were analyzed with 1-way ANOVA with Sidak's *post hoc* test for multiple comparisons. For all graphs, \* $p<0.05$ , \*\* $p<0.01$ , \*\*\* $p<0.001$ , \*\*\*\* $p<0.0001$ . Error bars represent SEM.

A

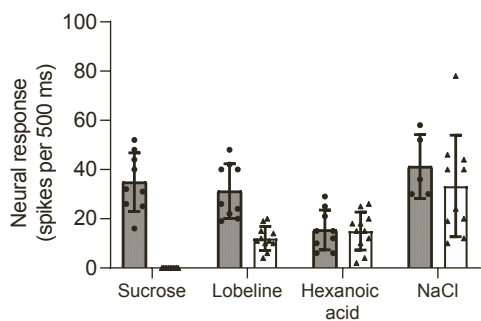

B

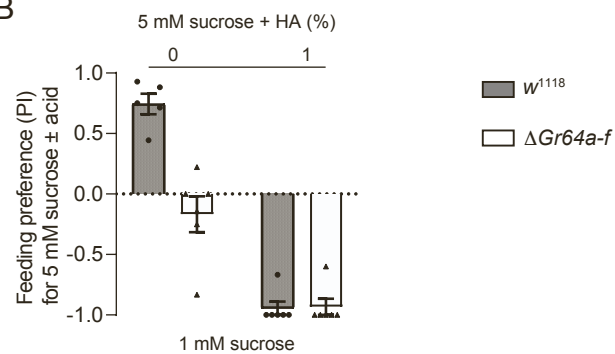

C

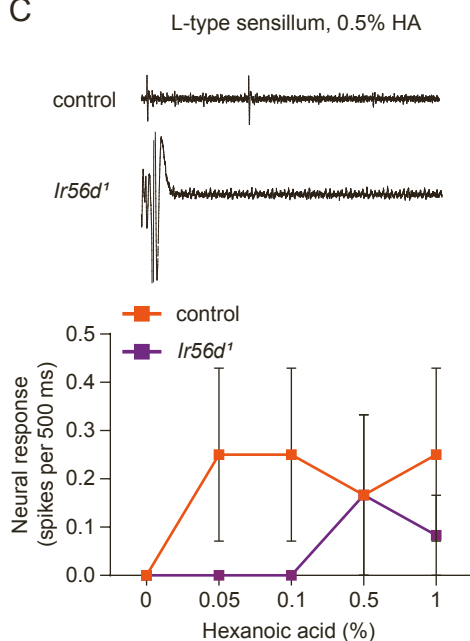

D

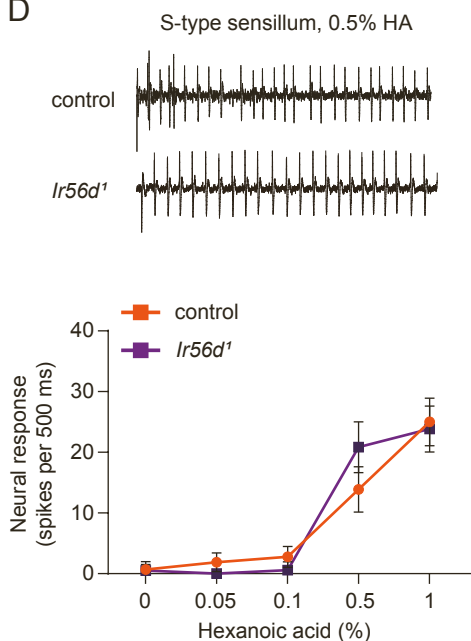

E

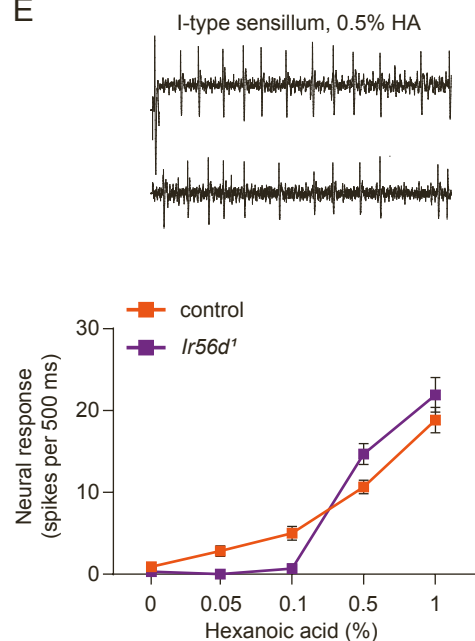

F

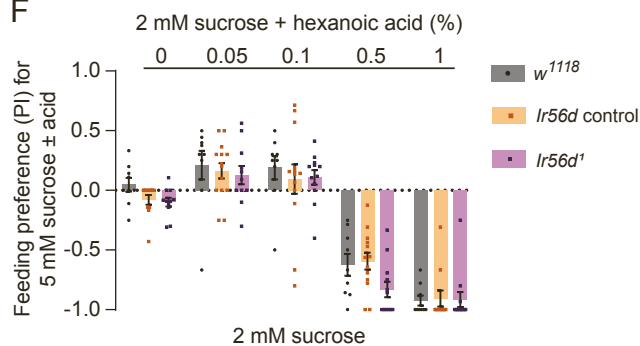

G

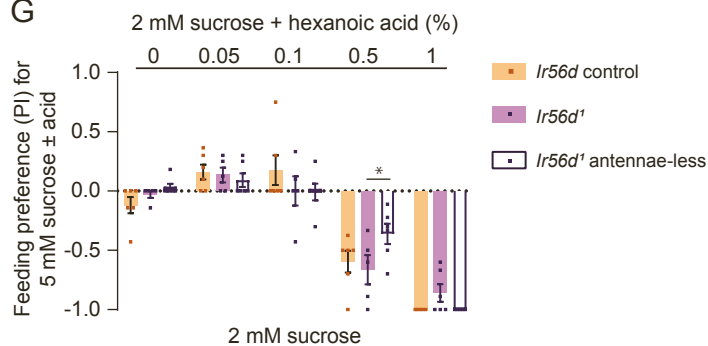

H

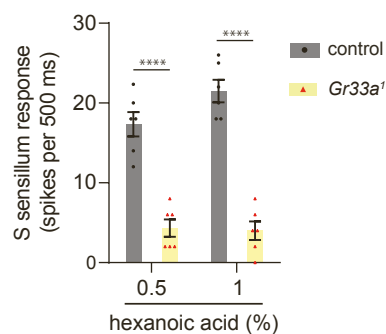

I

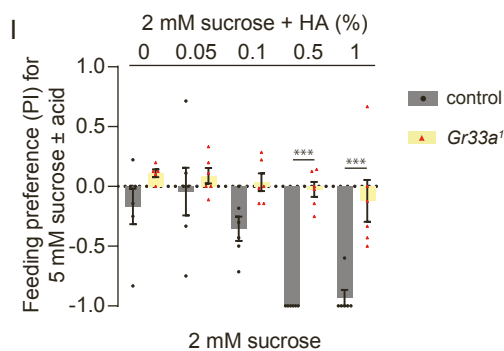

**Figure S4, Related to Figure 3. HA-evoked neuronal responses and behavioral aversion are retained in *Gr64a-f* and *Ir56d* mutants but not in *Gr33a* mutants.**

**A)** Mean responses obtained from labellar S-type sensilla stimulated with the indicated tastants. Genotypes were:  $w^{1118}$  and  $\Delta Gr64a-f$ . Stimuli were sucrose (100 mM), lobeline (10 mM), hexanoic acid (1%), and NaCl (500 mM).  $n=9-13$ . **B)** Feeding preference of  $w^{1118}$  and  $\Delta Gr64a-f$  flies for 5 mM sucrose mixed with hexanoic acid (HA) tested against 1 mM sucrose.  $n=5-6$ . **C-E)** Representative traces (top) and mean responses (bottom) of L-type (C,  $n=12$ ), S-type (D,  $n=9-12$ ) and I-type (E,  $n=13$ ) sensilla to indicated concentrations of hexanoic acid (HA). **F)** Feeding preference for mixtures of 2 mM sucrose with varying concentrations of hexanoic acid tested against 2 mM sucrose.  $n=9-12$ . **G)** Feeding preference for mixtures of 2 mM sucrose with varying concentrations of hexanoic acid tested against 2 mM sucrose.  $n=6$ . Genotypes in C-G were:  $w^{1118}$ , *Ir56d* parental line (*Ir56d* control), and *Ir56d*<sup>1</sup>. **H)** Responses of labellar S-type sensilla of  $w^{1118}$  and *Gr33a*<sup>1</sup> flies stimulated with indicated concentrations of hexanoic acid (HA).  $n=6$ . **I)** Feeding preference for mixtures of 2 mM sucrose with varying concentrations of hexanoic acid (HA) tested against 2 mM sucrose. Genotypes as in H.  $n=6$ . Data in A-E and H-I were analyzed using two-way ANOVA with Sidak's *post hoc* multiple comparisons test; data in F and G were analyzed using two-way ANOVA for repeated measures followed by Tukey's *post hoc* test for multiple comparisons. \* $p<0.05$ , \*\* $p<0.01$ , \*\*\* $p<0.001$ , \*\*\*\* $p<0.0001$ . Error bars represent SEM.

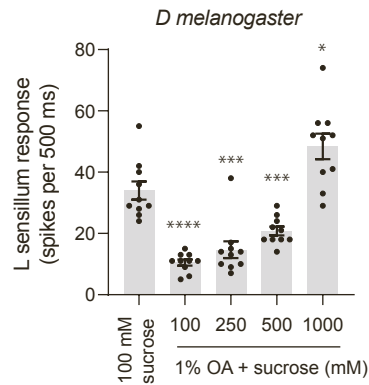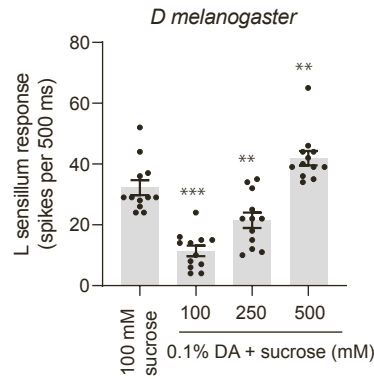

**Figure S5, Related to Figure 4. Noni FA-mediated inhibition of sweet taste is overcome by increasing sugar concentration.**

Mean responses of labellar L-type sensilla in *D. melanogaster* stimulated with sucrose alone (100 mM) or indicated concentrations mixed with 1% OA (top) or 0.1% DA (bottom).  $n=10-12$ . Data were analyzed using Mann Whitney test,  $*p<0.05$ ,  $**p<0.01$ ,  $***p<0.001$ ,  $****p<0.0001$ . Error bars represent SEM.
